# Supplementary material
Source: publisher figshare collection journal article supplement (https://acs.figshare.com/ndownloader/files/28345123)
Supplement: Supplementary file 1 [file 28345123]

Supporting Information

# Low-Cost Gel Polymer Electrolyte for High-Performance Aluminum Ion Batteries

*Zhidong Liu, † Xiaohang Wang, † Zhiyuan Liu, † Shuqing Zhang, † Zichuan Lv, †*

*Yanyan Cui, ‡ Li Du, † Kaiming Li, † Guoxin Zhang, † Meng-chang Lin, † Huiping*

*Du, \*, †*

†College of Electronic Engineering and Automation, Shandong University of Science and Technology, Qingdao 266590, China.

‡ Institute of Nanotechnology, Karlsruhe Institute of Technology (KIT), Hermann-von-Helmholtz-Platz 1, 76344 Eggenstein Leopoldshafen, Germany.

\*Corresponding authors.

E-mail addresses: [duhp@sdust.edu.cn](mailto:duhp@sdust.edu.cn)

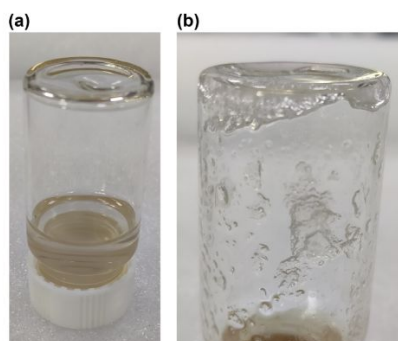

**Figure S1.** Digital photos of the  $\text{AlCl}_3/\text{Et}_3\text{NHCl}$  ( $r=1.3$ ) mixture: (a) liquid state and (b) transparent ice-like state.

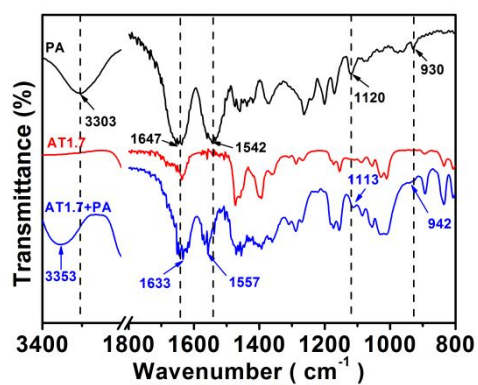

**Figure S2.** FTIR spectra of PA, AlCl<sub>3</sub>/Et<sub>3</sub>NHCl (r=1.7) ionic liquid and the AlCl<sub>3</sub>/Et<sub>3</sub>NHCl (r=1.7) gel polymer electrolyte

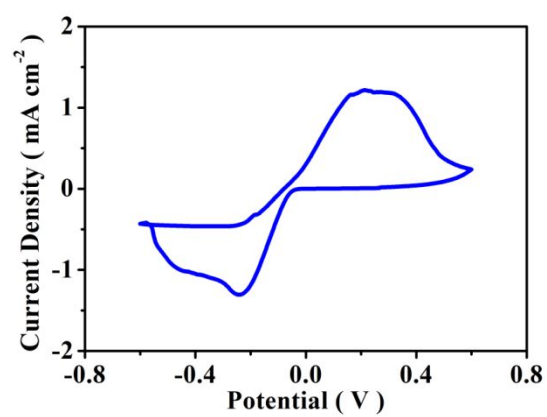

**Figure S3.** Reversible Al stripping/plating behavior of the  $\text{AlCl}_3/\text{Et}_3\text{NHCl}$  ( $r=1.7$ ) gel polymer electrolytes.

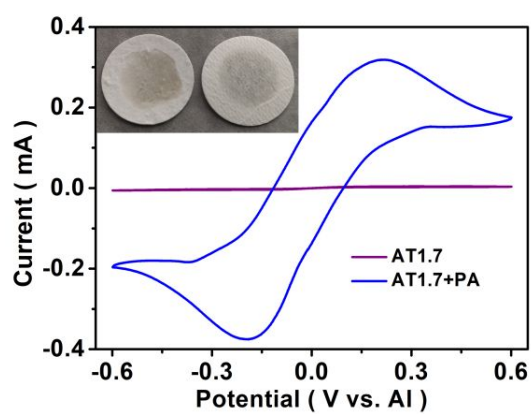

**Figure S4.** Comparison of cyclic voltammetry of the  $\text{AlCl}_3/\text{Et}_3\text{NHCl}$  ( $r=1.7$ ) gel polymer electrolyte and the  $\text{AlCl}_3/\text{Et}_3\text{NHCl}$  ( $r=1.7$ ) ionic liquid electrolyte after being exposed to the air for 10 min at a scan rate of  $1 \text{ mV s}^{-1}$ .

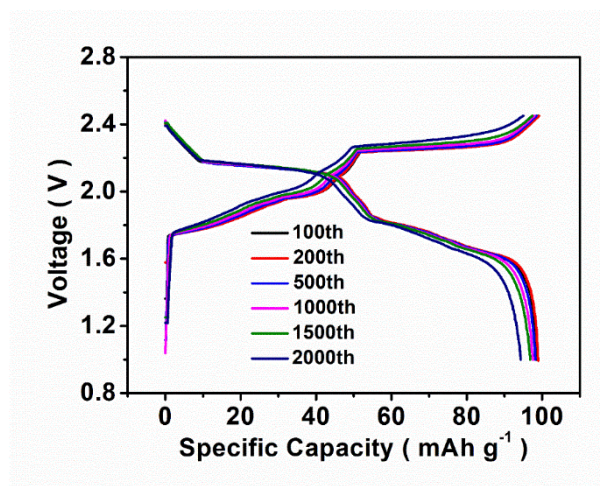

**Figure S5.** The charge/discharge curves of the Al/graphite batteries with the  $\text{AlCl}_3/\text{Et}_3\text{NHCl}$  ( $r=1.7$ ) gel polymer electrolyte at different cycles at room temperature.

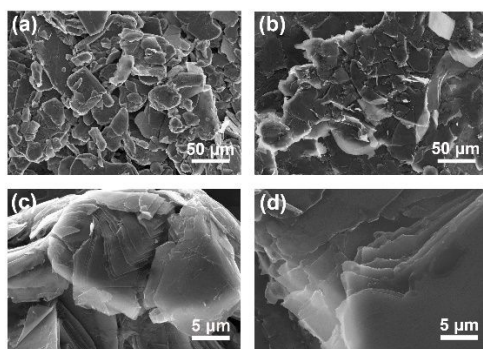

**Figure S6.** SEM images of the graphite cathode: (a), (c) before cycling and (b), (d) after cycling.

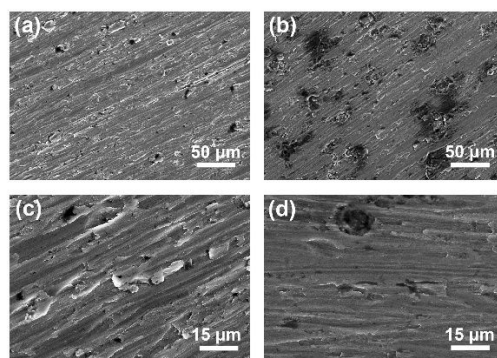

**Figure S7.** SEM images of the Al foil anode: (a), (c) before cycling and (b), (d) after cycling.

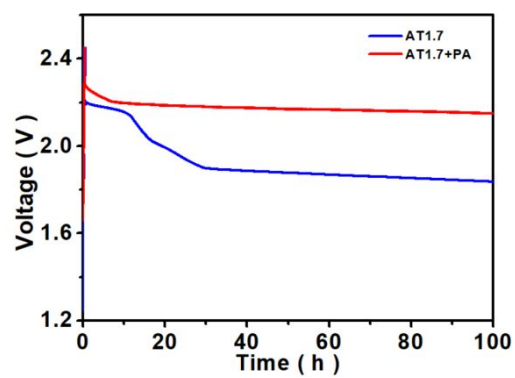

**Figure S8.** Self-discharge behaviors of the Al//GPE//Graphite and the Al//IL//Graphite batteries subjected to 100 h rest after charging to 2.45 V at a constant current density of 200 mA g<sup>-1</sup>.

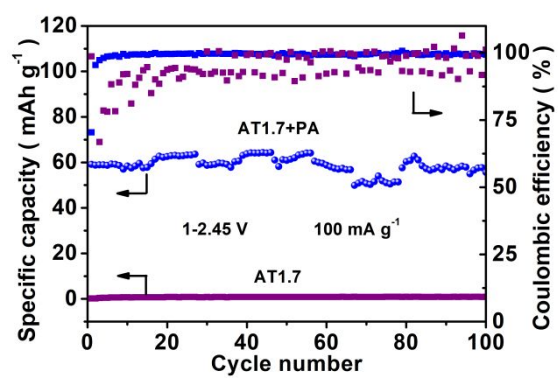

**Figure S9.** The electrochemical performance of the Al/graphite batteries with the GPE electrolyte and the ionic liquid electrolyte that are exposed to the air for 10 min.

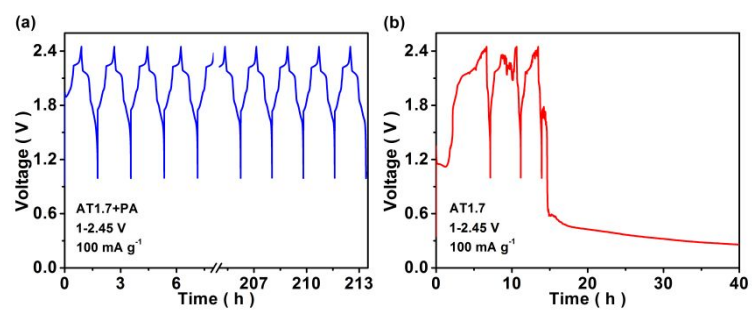

**Figure S10.** The charge-discharge profiles of the Al/graphite batteries with (a) the GPE electrolyte and (b) the ionic liquid electrolyte in coin cell assembly.

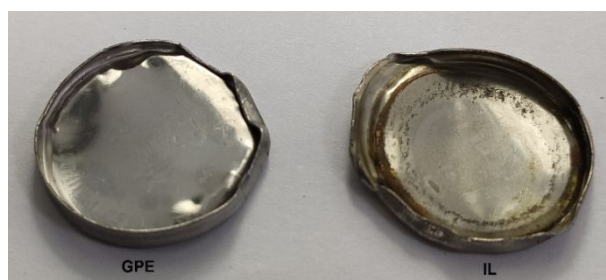

**Figure S11.** Digital photos of the disassembled coin cell shells of the Al//GPE//Graphite battery and the Al//IL//graphite battery after cycling.

**Table S1.** The price comparison of different reagents from different brands.

| reagent \ brand                   | Aladdin      | Sigma-Aldrich    | Macklin      |
|-----------------------------------|--------------|------------------|--------------|
| AlCl <sub>3</sub> (99.99%, 100 g) | ¥ 3,699.00   | ¥ 1,128.58       | ¥ 2,920.00   |
| EMIC (98%, 25 g)                  | ¥ 181        | ¥ 1,023.89       | ¥ 180        |
| Et <sub>3</sub> NHCl (99%)        | ¥ 49 ( 250g) | ¥ 467.59 ( 250g) | ¥ 91 ( 500g) |

**Table S2.** The ionic conductivities of the  $\text{AlCl}_3/\text{Et}_3\text{NHCl}$  ( $r=1.7$ ) gel polymer electrolyte at different temperature.

| Temperature ( $^{\circ}\text{C}$ )         | 80   | 70   | 60   | 50   | 40   | 30   | 25   |
|--------------------------------------------|------|------|------|------|------|------|------|
| Ionic conductivity ( $\text{mS cm}^{-1}$ ) | 8.50 | 7.47 | 7.21 | 6.76 | 5.66 | 4.51 | 3.86 |

**Table S3.** The performance comparison with previous reports.

| Electrolytes                                                  | Positive electrode     | Current density<br>( mA g <sup>-1</sup> ) | Capacity ( mAh g <sup>-1</sup> ) | Cycles | Working time ( h ) |
|---------------------------------------------------------------|------------------------|-------------------------------------------|----------------------------------|--------|--------------------|
| AlCl <sub>3</sub> /EMIC (r=1.3) <sup>10</sup>                 | Natural graphite       | 660                                       | 60                               | 6000   | ~1091              |
| AlCl <sub>3</sub> /Urea (r=1.3) <sup>18</sup>                 | Graphite               | 100                                       | 73                               | 200    | ~292               |
| AlCl <sub>3</sub> /Et <sub>3</sub> NHCl (r=1.7) <sup>19</sup> | Graphite               | 1000                                      | 64                               | 1000   | ~128               |
| AlCl <sub>3</sub> /Urea (r=1.3) <sup>20</sup>                 | Natural graphite       | 600                                       | 50                               | 1000   | ~167               |
| AlCl <sub>3</sub> -NaCl-LiCl-KCl <sup>25</sup>                | Graphite               | 200                                       | 83.4-114.9                       | 1500   | ~1350-1800         |
| AlCl <sub>3</sub> /Et <sub>3</sub> NHCl (r=1.5) <sup>27</sup> | Graphene               | 5000                                      | 112                              | 30000  | ~1344              |
| EMIC-GPE <sup>29</sup>                                        | Graphite               | 60                                        | 109-120                          | 100    | ~400               |
| Et <sub>3</sub> NHCl-GPE <sup>30</sup>                        | Graphite               | 1000                                      | 90                               | 800    | ~108               |
| AlCl <sub>3</sub> /EMIC (r=1.3) <sup>38</sup>                 | GF-HC                  | 100000                                    | 120                              | 250000 | ~600               |
| AlCl <sub>3</sub> /EMIC (r=1.3) <sup>39</sup>                 | Few-layer graphene:CoB | 1000                                      | ~70                              | 4250   | ~595               |
| AlCl <sub>3</sub> /EMIC (r=1.3) <sup>40</sup>                 | Carbon nanoscrolls     | 50000                                     | ~101                             | 55000  | ~222               |
| AlCl <sub>3</sub> /EMIC (r=1.3) <sup>41</sup>                 | Graphene aerogel       | 5000                                      | 100                              | 25000  | ~1000              |
| Our work                                                      | Graphite               | 200                                       | 94.6                             | 2000   | ~1892              |
